# Supplementary material for: Dissemination of Carbapenemases and MCR-1 Producing Gram-Negative Bacteria in Aquatic Environments in Batna, Algeria
Source: MDPI journal article supplement (doi:10.3390/antibiotics11101314), 2022-09-27
Supplement: s1 [file s1]

**Table S1.** Sample sources, numbers and sampling dates.

| Sampling date | Source              | Type                           | Number |
|---------------|---------------------|--------------------------------|--------|
| 20/01/2019    | University hospital | Wastewater                     | 08     |
| 21/02/2019    | Cancer hospital     |                                | 05     |
| 19/05/2019    | Wadi El Gourzi      |                                | 13     |
| 08/09/2019    | Public hospital     |                                | 03     |
| 01/10/2019    | Maternity hospital  |                                | 05     |
| 17/10/2019    | University hospital |                                | 01     |
| Total         |                     |                                | 35     |
| 03/09/2019    | Public hospital     | Tap water<br>and<br>well water | 27     |
| 08/09/2019    | Public hospital     |                                | 07     |
| 16/09/2019    | Maternity hospital  |                                | 30     |
| 22/09/2019    | Maternity hospital  |                                | 03     |
| 23/09/2019    | Maternity hospital  |                                | 05     |
| 20/09/2019    | University hospital |                                | 20     |
| 03/10/2019    | University hospital |                                | 20     |
| 07/10/2019    | Cancer hospital     |                                | 23     |
| 14/10/2019    | University hospital |                                | 21     |
| 15/10/2019    | University hospital |                                | 06     |
| 16/10/2019    | Cancer hospital     |                                | 10     |
| Total         |                     |                                | 172    |
