# Supplementary material for: Dissemination of Carbapenemases and MCR-1 Producing Gram-Negative Bacteria in Aquatic Environments in Batna, Algeria
Source: MDPI journal article supplement (doi:10.3390/antibiotics11101314), 2022-09-27
Supplement: s1 [file s1]

**File A1. Primers used for the detection of colistin resistance mechanisms in this study.**

**A. Mutational mechanisms**

**1. *Klebsiella pneumoniae***

| Target gene | PCR Type                | Sequences                       | Program                                       | Reference                 |
|-------------|-------------------------|---------------------------------|-----------------------------------------------|---------------------------|
| <i>PmrA</i> | Standard                | pmrA_F ATCTGTTCTCCACCCTGCTC     | Annealing T° : 55°C<br>Extension : 1 min 30 s | (Olaitan et al.,<br>2014) |
|             |                         | pmrA_R CATGCTCCACATGTTTCTGG     |                                               |                           |
| <i>PmrB</i> | Standard                | pmrB-KP-F1 CGACATTTACAGCTGGGACA |                                               |                           |
|             |                         | PmrB-KP-R2 TTGCGGCCTTCTTAATGTTT |                                               |                           |
|             | Sequencing              | pmrB-KP-F1 CGACATTTACAGCTGGGACA | -                                             |                           |
|             |                         | pmrB-KP-R1 TTTACCACGTCATCCAGCAA |                                               |                           |
|             |                         | pmrB-KP-F2 GAGCTGCTGGCGAAAGTG   |                                               |                           |
|             |                         | pmrB-KP-R2 TTGCGGCCTTCTTAATGTTT |                                               |                           |
| <i>PhoP</i> | Standard                | phoP_F GAAGCGAACCCGTAATGACA     | Annealing T° : 55°C<br>Extension : 1 min 30 s |                           |
|             |                         | phoP_R AACAGCCGTTTATATTTTGCGTA  |                                               |                           |
| <i>PhoQ</i> | Standard                | phoQ_F GCAGGTGTCTGACAGGGATT     | Annealing T° : 55°C<br>Extension : 1 min 30 s |                           |
|             |                         | phoQ_R AGGCTGAATACCCACAGGAC     |                                               |                           |
|             | Sequencing              | phoQ_F GCAGGTGTCTGACAGGGATT     | -                                             |                           |
|             |                         | phoQ_R AGGCTGAATACCCACAGGAC     |                                               |                           |
|             |                         | phoQ_F1 ATTGACCCCTTTGCGCTGATA   |                                               |                           |
|             |                         | phoQ_R1 ATCCGCGAACAGGGCGACGACT  |                                               |                           |
| <i>mgrB</i> | Standard and sequencing | mgrB_F1 ATTCTGCCGCTTTTGCTG      | Annealing T° : 51°C<br>Extension : 74°C/90 s  |                           |
|             |                         | mgrB_R1 CGTTTTGAAACAAGTCGATGA   |                                               |                           |

## 2. *Enterobacter cloacae*

| Target gene        | PCR Type                | Sequences                       | Program                                       | Reference |
|--------------------|-------------------------|---------------------------------|-----------------------------------------------|-----------|
| <b><i>PmrA</i></b> | Standard and sequencing | pmrA_F ATGAAACTACTGATAGTTGAAGA  | Annealing T° : 55°C<br>Extension : 1 min 30 s | Our lab   |
|                    |                         | pmrA_R CATTTMTGDCTMTCCAGMCG     |                                               |           |
| <b><i>PmrB</i></b> | Standard and sequencing | pmrB_F ATGAACAGYATGCGYCGGCG     |                                               |           |
|                    |                         | pmrB_R CTCAGRCCMAGSCCRCTR       |                                               |           |
| <b><i>PhoP</i></b> | Standard and sequencing | phoP_F ATGCGCGTACTGGTTGTTGA     |                                               |           |
|                    |                         | phoP_R GCGTAWTTCRAACAGRTARC     |                                               |           |
| <b><i>PhoQ</i></b> | Standard and sequencing | phoQ_F CCCTYTCRCTGCGGGTTCG      |                                               |           |
|                    |                         | phoQ_R TCGTACTGRTCGACRATYTC     |                                               |           |
| <b><i>mgrB</i></b> | Standard and sequencing | mgrB_F CGGTTTACTCTATGAAACAAGTGC |                                               |           |
|                    |                         | mgrB_R GCGAAGGAAGGAAATCACCT     |                                               |           |

## B. *mcr* genes

| Target gene  | PCR Type                | Sequences                                              | Reference               |
|--------------|-------------------------|--------------------------------------------------------|-------------------------|
| <i>mcr-1</i> | RT PCR                  | F: GCAGCATACTTCTGTGTGGTAC                              | (Chabou et al., 2016)   |
|              |                         | R: ACAAAGCCGAGATTGTCCGCG                               |                         |
|              |                         | Probe : FAM-GACCGCGACCGCCAATCTTACC-TAMRA               |                         |
|              | Standard and sequencing | F: GCAGCATACTTCTGTGTGGTAC<br>R: TATGCACGCGAAAGAAACTGGC | (Touati et al., 2019)   |
| <i>mcr-2</i> | RT PCR                  | F: CTGTGCCGTGTATGTTTCAGC                               |                         |
|              |                         | R: TTATCCATCACGCCTTTTGAG                               |                         |
|              |                         | Probe: VIC-TGACCGCTTGGGTGTGGGTA-TAMRA                  |                         |
| <i>mcr-3</i> | RT PCR                  | F: TGAATCACTGGGAGCATTAGGGC                             |                         |
|              |                         | R: TGCTGCAAACACGCCATATCAAC                             |                         |
|              |                         | Probe: FAM-TGCACCGGATGATCAGACCCGT-TAMRA                |                         |
| <i>mcr-4</i> | RT PCR                  | F: GCCAACCAATGCTCATACCCAAAA                            |                         |
|              |                         | R: CCGCCCCATTCGTGAAAACATAC                             |                         |
|              |                         | Probe : FAM-GCCACGGCGGTGTCTCTACCC-TAMRA                |                         |
| <i>mcr-5</i> | RT PCR                  | F: TATCCCGCAAGCTACCGACGC                               |                         |
|              |                         | R: ACGGGCAAGCACATGATCGGT                               |                         |
|              |                         | Probe: FAM-TGCGACACCACCGATCTGGCCA-TAMRA                |                         |
|              | Standard and sequencing | F: ATGCGGTTGTCTGCATTTATC<br>R: TCATTGTGGTTGTCCTTTTCTG  | (Borowiak et al., 2017) |
| <i>mcr-8</i> | RT PCR                  | F: TCCGGGATGCGTGACGTTGC                                | (Nabti et al., 2020)    |
|              |                         | R: TGCTGCGCGAAT-GAAGACG                                |                         |
|              |                         | Probe: FAM-TCATGGAGAATCGCTGGGG-GAAAGC-TAMRA            |                         |

## References

- Borowiak, M.; Fischer, J.; Hammerl, J.A.; Hendriksen, R.S.; Szabo, I. and Malorny, B., 2017. Identification of a novel transposon-associated phosphoethanolamine transferase gene, *mcr-5*, conferring colistin resistance in d-tartrate fermenting *Salmonella enterica* subsp. *enterica* serovar Paratyphi B. *Journal of Antimicrobial Chemotherapy* 72(12), 3317-3324.
- Chabou, S.; Leangapichart, T.; Okdah, L.; Le Page, S.; Hadjadj, L. and Rolain, J.M., 2016. Real-time quantitative PCR assay with Taqman® probe for rapid detection of MCR-1 plasmid-mediated colistin resistance. *New Microbes New Infect* 13, 71-74.
- Nabti, L.Z.; Sahli, F.; Ngaiganam, E.P.; Radji, N.; Mezaghcha, W.; Lupande-Mwenebitu, D.; Baron, S.A.; Rolain, J.-M. and Diene, S.M., 2020. Development of real-time PCR assay allowed describing the first clinical *Klebsiella pneumoniae* isolate harboring plasmid-mediated colistin resistance *mcr-8* gene in Algeria. *J Glob Antimicrob Resist* 20, 266-271.
- Olaitan, A.O.; Diene, S.M.; Kempf, M.; Berrazeg, M.; Bakour, S.; Gupta, S.K.; Thongmalayvong, B.; Akkhavong, K.; Somphavong, S.; Paboriboune, P.; Chaisiri, K.; Komalamisra, C.; Adelowo, O.O.; Fagade, O.E.; Banjo, O.A.; Oke, A.J.; Adler, A.; Assous, M.V.; Morand, S.; Raoult, D. and Rolain, J.M., 2014. Worldwide emergence of colistin resistance in *Klebsiella pneumoniae* from healthy humans and patients in Lao PDR, Thailand, Israel, Nigeria and France owing to inactivation of the PhoP/PhoQ regulator *mgrB*: an epidemiological and molecular study. *Int J Antimicrob Agents* 44(6), 500-507.
- Touati, M.; Hadjadj, L.; Berrazeg, M.; Baron, S. and Rolain, J.M., 2019. Emergence of *Escherichia coli* harboring *mcr-1* and *mcr-3* gene in North West Algerian farmlands. *J Glob Antimicrob Resist*.
